# Supplementary material for: Seroprevalence of syphilis among HIV-infected individuals in Addis Ababa, Ethiopia: a hospital-based cross-sectional study
Source: PubMed Central journal article supplement — BMJ Open. 2013 Apr 1;3(4):e002566. doi: 10.1136/bmjopen-2013-002566 (PMC3641471; doi:10.1136/bmjopen-2013-002566), 2013-04-01
Supplement: bmjopen-2013-002566.draft_revisions.pdf [file bmjopen-2013-002566.draft_revisions.pdf]

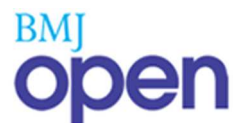

**Higher sero-prevalence of syphilis among HIV infected individuals in Addis Ababa, Ethiopia: A hospital based cross-sectional study**

|                                 |                                                                                                                                                                                                                                                                   |
|---------------------------------|-------------------------------------------------------------------------------------------------------------------------------------------------------------------------------------------------------------------------------------------------------------------|
| Journal:                        | <i>BMJ Open</i>                                                                                                                                                                                                                                                   |
| Manuscript ID:                  | bmjopen-2013-002566                                                                                                                                                                                                                                               |
| Article Type:                   | Research                                                                                                                                                                                                                                                          |
| Date Submitted by the Author:   | 05-Jan-2013                                                                                                                                                                                                                                                       |
| Complete List of Authors:       | Eticha, Begna; Madawalabu University, Medicine<br>Sisay, Zufan; Addis Ababa University, Aklilu Lemma Institute of Pathobiology<br>Alemayew, Addisu; Hawasa University, Medical Laboratory Sciences<br>Shimelis, T; Hawasa University, Medical Laboratory Sciences |
| <b>Primary Subject Heading</b>: | Epidemiology                                                                                                                                                                                                                                                      |
| Secondary Subject Heading:      | Infectious diseases                                                                                                                                                                                                                                               |
| Keywords:                       | Epidemiology < INFECTIOUS DISEASES, HIV & AIDS < INFECTIOUS DISEASES, Microbiology < PATHOLOGY                                                                                                                                                                    |
|                                 |                                                                                                                                                                                                                                                                   |

SCHOLARONE™  
Manuscripts

1  
2  
3  
4  
5  
6  
7  
8  
9  
10  
11  
12  
13  
14  
15  
16  
17  
18  
19  
20  
21  
22  
23  
24  
25  
26  
27  
28  
29  
30  
31  
32  
33  
34  
35  
36  
37  
38  
39  
40  
41  
42  
43  
44  
45  
46  
47  
48  
49

**Higher sero-prevalence of syphilis among HIV infected individuals in Addis Ababa, Ethiopia:  
A hospital based cross-sectional study**

Begna Tulu<sup>1</sup>, Zufan Sisay<sup>2</sup>, Addisu Alemayehu <sup>3</sup>, and Techalew Shimelis<sup>3\*</sup>

- <sup>1</sup>Madawalabu University, Department of Medicine, Bale Goba, Ethiopia
- <sup>2</sup>Addis Ababa University, Aklilu Lemma Institute of Pathobiology, Addis Ababa, Ethiopia
- <sup>3</sup>Hawassa University, College of Medicine and Health Sciences, PO Box: 1560 Hawassa, Ethiopia

\*Corresponding author: Tel: +251916828259, Email: [techalew03@yahoo.com](mailto:techalew03@yahoo.com)

## ABSTRACT

### Objective

To determine the prevalence of syphilis and its risk factors among people with human immunodeficiency virus (HIV) at a hospital in Ethiopia.

### Design

A hospital based cross-sectional study

### Setting

This study was conducted at one of the largest public hospitals in Addis Ababa, Ethiopia.

### Participants

A consecutive 306 HIV- positive patients were recruited prospectively from January to March 2010. For comparative purposes, 224

HIV- negative consecutive attendees at the voluntary counseling and testing (VCT) center in the same period were also included.

Participants under 15 years of age and treated for syphilis and with a CD4+ T cell count below 50 cells / mm<sup>3</sup> were excluded.

### Outcome measures

Blood samples and data on socio-demographic and risk factors for syphilis were collected. All sera were screened for syphilis using

Rapid Plasma Reagin (RPR) test, and those positives were re-tested using Treponema Pallidum Heamagglutination (TPHA) test.

### Results

The sero-prevalence of syphilis among HIV infected individuals was 9.8% compared to 1.3% among HIV uninfected individuals (Odds ratio (OR) 8.01; 95% CI 2.4 to 26.6; p= 0.001). A comparable rate of syphilis was found among men (11%) and women (8.9%) with HIV infection. Syphilis prevalence non-significantly increased with age, with the highest rate in 40-49 years of age (16.9%).

1  
2  
3 Except a history of STIs, which associated with syphilis (OR 2.25; 95% CI 1.03 to 4.9; p= 0.042), other risk factors did not raise the  
4 odds of infection.  
5  
6

### 7 **Conclusion**

8  
9 The high prevalence of syphilis among people with HIV infection highlights the need to target this population to prevent the  
10 transmission of both infections. Screening all HIV infected people for syphilis and managing those infected would have clinical and  
11 epidemiological importance.  
12  
13  
14  
15  
16

## 17 **ARTICLE SUMMARY**

### 18 **Article focus**

- 19 • To determine the prevalence of syphilis among HIV infected people
- 20
- 21 • To compare prevalence of syphilis by HIV status
- 22
- 23 • To assess risk factors for syphilis in HIV infected people
- 24
- 25
- 26
- 27
- 28
- 29

### 30 **Key Messages**

- 31 • High prevalence of syphilis among HIV positive individuals was observed
- 32
- 33 • Syphilis prevalence is significantly higher among HIV positives than HIV negative people
- 34
- 35 • Syphilis prevalence is not significantly influenced by age and gender
- 36
- 37
- 38
- 39
- 40
- 41
- 42
- 43
- 44
- 45
- 46
- 47
- 48
- 49

### Strength and limitation of this study

- This hospital based cross-sectional study provided preliminary data for further detailed information
- No clinical features of syphilis positive patients were assessed

### INTRODUCTION

Sexually transmitted infections (STIs) are the major public health problems in most parts of the world. Based on the World Health Organization estimate, STIs and their complications are among the top five disease categories for which adults seek health care in developing countries.[1] Syphilis is one of the most important STIs, caused by the bacterium *Treponema pallidum*. [2] It has been estimated that, annually, about 12 million new infections occur worldwide; of which, almost two-thirds are in sub-Saharan Africa and south/southeast Asia.[3] Unprotected sex, blood transfusion, needle sharing, and vertical transmission from mother to the child are major mode of syphilis transmission.[2, 4]

Syphilis, as cause of ulcerative genital lesion, presents site for HIV entry and shading. Moreover, by activating immune cells and raising viral load, syphilis could facilitate HIV transmissibility.[5] On the ether hand, concurrent HIV infection may adversely affect the natural history, clinical manifestations and treatment response of syphilis.[3, 6]

In Ethiopia, studies reported syphilis prevalence ranging from 1% to 10.9% in diverse risk groups such as pregnant women, blood donors, street dwellers and elderly people.[7-10] Moreover, according to the antenatal care (ANC)-based sentinel surveillances, syphilis prevalence increased from 1.8% in the year 2003 to 2.7% in 2005, and then it stabilized at 2.3% in 2007 and 2009. The rates

1  
2  
3 of syphilis-HIV co-infection among ANC attendees had also been rising from 4.1% in the year 2003 to 4.9% in 2005 and 5.3% in  
4  
5  
6 2007, but dropped to 3.9% in 2009.[11-14] However, because of the limitation that the aforementioned risk groups consist of smaller  
7  
8 size of HIV infected individuals, and the sex and age composition of ANC attendees is limited to female gender and reproductive age  
9  
10 group, the generated data may not reflect the true picture of syphilis among HIV infected population. Therefore, this study was  
11  
12 conducted to determine the prevalence and risk factors of syphilis among HIV-infected clients at St. Paul's General Specialized  
13  
14 Hospital.  
15  
16

## 17 18 19 **METHODS AND MATERIALS**

20  
21  
22 This cross-sectional study was conducted at St. Paul's General Specialized Hospital, Addis Ababa from January to March 2010. The  
23  
24 hospital is among the largest public hospitals in Ethiopia and provides HIV voluntary counseling and testing (VCT) as a routine  
25  
26 service. Clients who are tested HIV positive are registered at the antiretroviral therapy (ART) clinic and assessed for their disease  
27  
28 status. Clinical and immunological assessments (CD4+ T cell count) at enrollment and at six-monthly follow-up visits help to  
29  
30 determine patient eligibility for ART. Those receiving ART are also monitored for clinical progress on a regular basis. Services  
31  
32 including HIV counselling and testing, clinical and immunological assessments as well as ART are provided free of charge.  
33  
34  
35  
36

37  
38 Consecutive HIV-infected individuals with and without ART status, and who had immunological and biochemical testing were  
39  
40 recruited prospectively. Clients tested HIV negative at the VCT center during the study period were also recruited for comparative  
41  
42  
43  
44  
45

1  
2  
3 purposes. In total, 306 HIV positive and 224 HIV negative clients were considered for analysis. In both HIV sero-groups, participants  
4  
5 under 15 years of age, and who took syphilis treatment were excluded. In HIV-positive clients, those found with a CD4+ T cell count  
6  
7 below 50 cells / mm<sup>3</sup> were excluded from the study due to the unreliability of serological tests in a state of severe immunosuppression.  
8  
9

10  
11 Counselor nurses interviewed the study participants using structured questionnaire on socio-demographic and other risk factors such  
12  
13 as history of blood transfusion, unsafe injection, multiple sexual partner, sexual transmitted infections (STIs), and syphilis family  
14  
15 history. Blood samples were collected and screened for syphilis using the non-treponemal serologic test, rapid plasma reagin (RPR)  
16  
17 test (Human, Germany). Sera found to be positive by RPR tests were further tested using modified *Treponema pallidum*  
18  
19 hemagglutination (TPHA) test (Syphicheck–WB, Qualpro Diagnostics, India). Laboratory testing was carried out according to the  
20  
21 directions of the manufacturers and all tests were run against the positive and negative controls. Only those samples positive by both  
22  
23 RPR and TPHA were considered to have syphilis infection.  
24  
25  
26  
27  
28

29 The study was approved by the Ethics Review Committee of Aklilu Lemma Institute of Pathobiology, Addis Ababa University, and  
30  
31 St. Paul's Hospital management body. Participation was entirely voluntary, and written consent was obtained from the study subjects.  
32  
33  
34 Any information obtained during the study was kept with utmost confidentiality. Syphilis screening was performed free of charge, and  
35  
36 those tested positive were managed by physicians.  
37  
38  
39  
40  
41  
42  
43  
44  
45

1  
2  
3  
4  
5  
6  
7  
8  
9  
10  
11  
12  
13  
14  
15  
16  
17  
18  
19  
20  
21  
22  
23  
24  
25  
26  
27  
28  
29  
30  
31  
32  
33  
34  
35  
36  
37  
38  
39  
40  
41  
42  
43  
44  
45  
46  
47  
48  
49

Data entry and analysis was performed using SPSS Version-16. Result was summarized using descriptive statistics including mean, range and proportions. Difference in proportions was evaluated using Pearson’s Chi-square test. Binary logistic regression analysis was used to assess the effect of socio-demographic and other risk factors on syphilis sero- positivity. Odds ratio was used as a measure of the strength of association.

**RESULTS**

Out of 312 HIV positive and 228 HIV negative individuals approached during the study period, 6 and 4 individuals were excluded due to refusal to participate, insufficient serum sample and incomplete questioner. Thus, 306 HIV positive and 224 HIV negative clients were considered for analysis. One hundred eighty eight (61.4%) participants with HIV were receiving ART and the rest were ART naïve (38.6%). Majority of HIV infected participants were urban dwellers (95.4%) and married (53.3%) (Table 1). HIV infected respondents had a mean age 35.8 years (SD 8.7; range 19- 73 years) compared to 28.2 years (SD 9.8; range 15- 73 years) in HIV non-infected groups. The male to female ratios in participants with and without HIV infection were 0.71:1 and 0.96:1, respectively.

Table 1. Syphilis infection in relation to socio-demography in HIV-positive and HIV- negative individuals at St. Paul Hospital, 2010

| Characteristics | HIV positive     |                                 |                          | HIV negative     |                                 |                          |
|-----------------|------------------|---------------------------------|--------------------------|------------------|---------------------------------|--------------------------|
|                 | Number(%) tested | Number(%) positive for syphilis | Crude odds ratio(95% CI) | Number(%) tested | Number(%) positive for syphilis | Crude odds ratio(95% CI) |
| Residence       |                  |                                 |                          |                  |                                 |                          |



|                       |                          |           |          |                 |           |        |                 |
|-----------------------|--------------------------|-----------|----------|-----------------|-----------|--------|-----------------|
|                       | Rural                    | 14 (4.6)  | 0        |                 | 18(8)     | 0      |                 |
|                       | Urban                    | 292(95.4) | 30(10.3) | -               | 206(92)   | 3(1.5) | -               |
| Sex                   |                          |           |          |                 |           |        |                 |
|                       | Female                   | 179(58.5) | 16(8.9)  | 1               | 114(50.9) | 1(0.9) | 1               |
|                       | Male                     | 127(41.5) | 14(11)   | 1.26(0.59-2.69) | 110(49.1) | 2(1.8) | 2.1(0.18-23.4)  |
| Age (years)           |                          |           |          |                 |           |        |                 |
|                       | 20                       | 2(0.7)    | 0        | -               | 52(23.2)  | 1(1.9) | 1.84(0.11-30.1) |
|                       | 20-29                    | 65(21.2)  | 4(6.2)   | 1               | 95(42.4)  | 1(1.1) | 1               |
|                       | 30-39                    | 156(51)   | 13(8.3)  | 1.39(0.41-4.42) | 47(21)    | 0      | -               |
|                       | 40-49                    | 59(19.3)  | 10(16.9) | 3.11(0.92-10.5) | 19(8.5)   | 1(5.3) | 5.2(0.31-87.4)  |
|                       | 50                       | 24(7.8)   | 3(12.5)  | 2.18(0.45-10.5) | 11(4.9)   | 0      | -               |
| Marital status        |                          |           |          |                 |           |        |                 |
|                       | Single                   | 60(19.6)  | 5(8.3)   | 1.41(0.39-5.1)  | 146(65.2) | 3(2.1) | -               |
|                       | Married                  | 163(53.3) | 20(12.3) | 2.2(0.79-6)     | 60(26.8)  | 0      |                 |
|                       | Divorced/<br>Widowed     | 83(27.1)  | 5(6)     | 1               | 18(8)     | 0      |                 |
| Religion              |                          |           |          |                 |           |        |                 |
|                       | Orthodox                 | 228(74.5) | 24(10.5) | 2.1(0.47-9.1)   | 170(75.9) | 3(1.8) | -               |
|                       | Protestant               | 41(13.4)  | 4(9.8)   | 1.9(0.32-10.9)  | 25(11.2)  | 0      |                 |
|                       | Muslim                   | 37(12.1)  | 2(5.4)   | 1               | 29(12.9)  | 0      |                 |
| Educational<br>status |                          |           |          |                 |           |        |                 |
|                       | Illiterate               | 41(13.4)  | 9(22)    | 4.78(0.96-23.8) | 13(5.8)   | 0      |                 |
|                       | Primary school           | 95(31)    | 8(8.4)   | 1.56(0.32-7.74) | 51(22.8)  | 0      |                 |
|                       | Secondary<br>school      | 134(43.8) | 11(8.2)  | 1.52(0.32-7.19) | 124(55.4) | 2(1.6) | -               |
|                       | Certificate and<br>above | 36(11.8)  | 2(5.6)   | 1               | 36(16.1)  | 1(2.8) |                 |
| Occupation            |                          |           |          |                 |           |        |                 |
|                       | Government<br>employee   | 41(13.4)  | 3(7.3)   | 1               | 29(12.9)  | 1(3.4) | 1               |
|                       | Private<br>employee      | 82(26.8)  | 8(9.8)   | 1.37(0.34-5.46) | 71(31.7)  | 1(1.4) | 0.4(0.02-6.62)  |

|            |          |         |                 |           |        |                 |
|------------|----------|---------|-----------------|-----------|--------|-----------------|
| Housewife  | 63(20.6) | 6(9.5)  | 1.33(0.31-5.66) | 21(9.4)   | 0      | -               |
| Student    | 5(1.6)   | 0       | -               | 41(18.3)  | 1(2.4) | 0.7(0.04-11.67) |
| Merchant   | 35(11.4) | 4(11.4) | 1.63(0.34-7.86) | 19(8.5)   | 0      |                 |
| House maid | 11(3.6)  | 3(27.3) | 4.75(0.81-27.9) | 7(3.1)    | 0      |                 |
| No work    | 69(22.5) | 6(8.7)  | 1.21(0.29-5.11) | 36(16.1)  | 0      |                 |
| Ethnicity  |          |         |                 |           |        |                 |
| Amhara     | 156(51)  | 14(9)   | 1               | 117(52.2) | 2(1.7) | 1               |
| Oromo      | 87(28.4) | 9(10.3) | 1.2(0.49-2.83)  | 64(28.6)  | 1(1.6) | 0.9(0.08-10.3)  |
| Others     | 63(20.6) | 7(11.1) | 1.3(0.49-3.3)   | 43(19.2)  | 0      | -               |

The prevalence of syphilis infection was 9.8% in HIV positive participants compared to 1.3% in HIV negative participants (Odds ratio (OR) 8.01; 95%CI 2.4 to 26.6;  $p=0.001$ ). The distribution of syphilis was similar among HIV infected clients with and without ART (11.2% versus 7.6%, respectively;  $p=0.31$ ). Sera reactive by RPR test were more likely found TPHA positive among HIV positives (54.5%) than in HIV-negatives (10%) ( $p<0.001$ ) (Table 2).

Syphilis occurred exclusively among urban dwellers in either HIV sero-groups. Sero-positivity of syphilis was comparable between men (11%) and women (8.9%) with HIV infection. Syphilis prevalence seems to increase with increasing age, with the highest rate in the age range 40-49 years (16.9%), though difference was non-significant compared to age less than 30 years (OR 3.11; 95%CI 0.92 to 10.5). A decreasing rate of syphilis was observed with increasing educational level, where illiterate HIV-positive participants (22%) had higher odds of infection compared to those having at least a certificate (5.6%) (OR 4.78; 95%CI 0.96 to 23.8;  $p=0.056$ ).

Similarly, the association between occupation and syphilis were marginally non-significant where housemaids (27.3%) were affected compared to government employees (7.3%) (OR 4.75; 95%CI 0.81 to 27.9;  $p=0.085$ ) (Table 1).

Table 2. Syphilis serological tests in HIV positive and HIV negative individuals at Saint Paul's Hospital, 2010.

| Syphilis test            | Total tested | Number (%) of positive | HIV- positive |          |           |         |        |          | HIV- negative |          |
|--------------------------|--------------|------------------------|---------------|----------|-----------|---------|--------|----------|---------------|----------|
|                          |              |                        | ART Users     |          | ART Naïve |         | Total  |          | Tested        | +Ve (%)  |
|                          |              |                        | Tested        | +Ve (%)  | Tested    | +Ve (%) | Tested | +Ve (%)  |               |          |
| RPR                      | 530          | 85(16)                 | 188           | 36(19.1) | 118       | 19(5.6) | 306    | 55(18)   | 224           | 30(13.4) |
| TPHA                     | 85           | 33(38.8)               | 36            | 21(58.3) | 19        | 9(47.4) | 55     | 30(54.5) | 30            | 3(10)    |
| Syphilis sero-positivity | 530          | 33(6.2)                | 188           | 21(11.2) | 118       | 9(7.6)  | 306    | 30(9.8)  | 224           | 3(1.3)   |

The exposure of HIV-infected and HIV-non-infected participants to different risk factors of syphilis is summarized in table 3. Except syphilis family history, which occurred in a comparable rate in either HIV sero-groups, other risk factors such as history of blood transfusion (10.5%), having multiple sexual partners (36.9%) and unsafe injection (12.7%), and a history of STIs (45.4%) were more frequently reported by HIV infected participants. However, it was only a history of STIs, which significantly associated with syphilis among HIV infected participants (OR 2.25; 95%CI 1.03 to 4.9; p= 0.042).

Table 3 syphilis infection in relation to syphilis risk factors in HIV-positive and HIV- negative individuals at St. Paul Hospital, 2010

| Characteristics | HIV positive | HIV negative |
|-----------------|--------------|--------------|
|-----------------|--------------|--------------|

|                         | Number(%)<br>tested | Number(%)<br>positive for<br>syphilis | Crude odds<br>ratio(95% CI) | Number(%)<br>tested | Number(%)<br>positive for<br>syphilis | Crude odds<br>ratio(95% CI) |
|-------------------------|---------------------|---------------------------------------|-----------------------------|---------------------|---------------------------------------|-----------------------------|
| Blood transfusion       |                     |                                       |                             |                     |                                       |                             |
| No                      | 274(89.5)           | 28(10.2)                              | 1                           | 216(96.4)           | 3(1.4)                                | -                           |
| Yes                     | 32(10.5)            | 2(6.2)                                | 0.59 (0.13-2.58)            | 8(3.6)              | 0                                     |                             |
| Multiple sexual partner |                     |                                       |                             |                     |                                       |                             |
| No                      | 193(63.1)           | 19(9.8)                               | 1                           | 195(87.1)           | 2(1)                                  | 1                           |
| Yes                     | 113(36.9)           | 11(9.7)                               | 0.99(0.45-2.16)             | 29(12.9)            | 1(3.4)                                | 3.45(0.3-39.2)              |
| Unsafe injection        |                     |                                       |                             |                     |                                       |                             |
| No                      | 267(87.3)           | 27(10.1)                              | 1                           | 219(97.8)           | 3(1.4)                                | -                           |
| Yes                     | 39(12.7)            | 3(7.7)                                | 0.71(0.21-2.57)             | 5(2.2)              | 0                                     |                             |
| Syphilis family history |                     |                                       |                             |                     |                                       |                             |
| No                      | 281(91.8)           | 26(9.3)                               | 1                           | 200(89.3)           | 2(1)                                  | 1                           |
| Yes                     | 25(8.2)             | 4(16)                                 | 1.87(0.60-5.86)             | 24(10.7)            | 1(4.2)                                | 4.3(0.38-49)                |
| STI                     |                     |                                       |                             |                     |                                       |                             |
| No                      | 167(54.6)           | 11(6.6)                               | 1                           | 182(81.2)           | 2(1.1)                                | 1                           |
| Yes                     | 139(45.4)           | 19(13.7)                              | 2.25(1.03-4.9)              | 42(18.8)            | 1(2.4)                                | (0.19-24.8)                 |

## DISCUSSION

This study showed that the prevalence of syphilis among HIV positives was 9.8%, with no significant difference between those receiving ART (11.2%) and ART naives (7.6%). The finding appears to be compatible with rates of HIV-syphilis co-infection among street dwellers (7.9%)[8] and elderly people (6%)[9] in northwest Ethiopia (Gondar) and in Nigeria (14%).[15] However, contrasting our result, the co-infection rate was lower among ANC-attendees in Ethiopia (3.9%)[14] and higher among STD clinic attendees in

1  
2  
3 Argentina (59.7%).[16] The observed inconsistencies may be because of the composition of the investigated sub-population, where  
4  
5 ANC attendees, for instance, have apparently lower risk of syphilis compared to STD clinic attendees. In view of the adverse impact  
6  
7 syphilis has to facilitate the transmission of coexisting HIV, intervention measures targeting this particular risk group has greater  
8  
9 importance to prevent both infections.  
10  
11

12  
13  
14 In the present study, syphilis was significantly associated with HIV infection, where HIV infected individuals had about eight-fold  
15  
16 higher risk of syphilis compared to HIV non-infected people. This result was in line with findings that revealed the existence of  
17  
18 association between HIV and syphilis in different localities and sub- populations. A consistent two-fold increase in syphilis-HIV co-  
19  
20 infection rates among ANC attendees[11-14] and four-fold among street dwellers in Ethiopia,[10] as well as eight-fold in HIV  
21  
22 infected population in Nigeria[15] may be because of the fact that HIV and syphilis shares routes of transmission. These reports also  
23  
24 indicated the varying strength of association between HIV and syphilis in diverse risk groups. However, none of these studies pointed  
25  
26 out whether syphilis and HIV were contracted concurrently or one infection preceded another to explain the causal nature of such  
27  
28 epidemiologic synergy between HIV and syphilis.  
29  
30  
31  
32  
33

34 The sero-prevalence of syphilis was not significantly affected by gender in either HIV sero-groups, similar to findings elsewhere.[10,  
35  
36 15] However, Griemberg *et al.* reported men had excess risk of HIV, syphilis and syphilis-HIV co-infection compared to women.[16]  
37  
38 This report is also in contrast to the established higher rate of HIV among women in our region,[17] which may be due to difference in  
39  
40 risk behavior by gender in various geographical regions. We also found increasing syphilis prevalence with age among HIV infected  
41  
42  
43  
44  
45

1  
2  
3 individuals, with the highest rate reported in the age group 40-49 years (16.9%), followed by age group above 50 years (12.5%),  
4  
5 though the difference was non-significant. A raising syphilis prevalence with age was consistently reported by others,[8, 10, 14, 15]  
6  
7 which might be due to the increased risk of exposure to syphilis with time. Moreover, our data showed that illiterate and housemaid  
8  
9 HIV infected participants were disproportionately affected by syphilis, which point the significance of education to prevent syphilis  
10  
11 transmission.  
12  
13  
14  
15

16 In Ethiopia, where HIV and syphilis has strong association, and transmission of the former is primarily through heterosexual  
17  
18 exposure,[17] people with multiple sexual partners would obviously be at higher risk of contracting syphilis as well. Of course, the  
19  
20 significance of such a risk behavior to influence syphilis prevalence in our context was documented, where having more than two  
21  
22 sexual partners increased odds of syphilis infection six-fold compared to those with no sexual partner.[10] However, the lack of  
23  
24 association between a history of multiple sexual partner and syphilis in our study deserves further investigation for possible  
25  
26 explanation. Syphilis prevalence was about two-fold higher among HIV infected participants who reported a history of STIs compared  
27  
28 with those with no history of STIs.  
29  
30  
31  
32  
33

34 In conclusion, this study showed high prevalence of syphilis among HIV infected people compared to HIV non-infected people. Thus,  
35  
36 intervention measures targeting HIV infected individuals would have paramount importance to prevent transmission of syphilis as  
37  
38 well as HIV. As part of this effort, screening all HIV infected people for syphilis and managing those infected is critically needed.  
39  
40 Further studies using a longitudinal design would reliably investigate the possible interaction between HIV and syphilis.  
41  
42  
43  
44  
45

## Acknowledgment

We would like to thank the physicians, counselor nurses and laboratory staff of St. Paul's Hospital for their kind assistance during data collection. Our appreciation also goes to the study subjects who volunteered to participate in the study. We acknowledge the Aklilu Lemma Institute of Pathobiology, Addis Ababa University, for financial and logistic support.

### Authors' contributions

BT was the principal investigator for the study; BT, AA and ZS contributed to the design of the study; BT carried out the laboratory work; ZS and AA supervised data collection; BT and TS performed the statistical analyses; BT, ZS and TS interpreted the result; all authors contributed to the write up and approved the final manuscript.

**Funding:** The study was financially supported by Aklilu Lemma Institute of Pathobiology, Addis Ababa University.

**Competing Interest:** None declared.

## REFERENCES

1. World Health Organization (WHO). Guidelines for the Management of Sexually Transmitted Infections. Revised Version. WHO, Geneva, Switzerland, 2003.
2. Singh EA, Romanowski B. Syphilis. Review with emphasis on clinical, epidemiologic, and some biologic features. *Clin Microbiol Rev* 1999; 12: 187–209
3. Lynn WA, Lightman S. Syphilis and HIV: a dangerous combination. *Lancet Infect Dis* 2004; 4: 456–66

- 1
- 2
- 3
- 4 4. World Health Organization. Global Elimination of Syphilis: rationale and strategy for action, 2007.
- 5
- 6 5. Ho LE, Lukehart AS. Syphilis: using modern approaches to understand an old disease. *J Clin Invest* 2011; 121: 4584–92.
- 7
- 8 6. Kassutto S, Sax P. HIV and Syphilis Co-infection: Trends and Interactions. *AIDS Clinic Care* 2003; 15: 9-18.
- 9
- 10 7. Andargachew M, Afework K, Belay T, et.al. Sero-prevalence of Syphilis and HIV-1 during pregnancy in a teaching hospital in
- 11 northwest Ethiopia. *Japan J Infect Dis* 2007; 60: 193-5.
- 12
- 13 8. Tessema B, Yismaw G, Kassu A, et al. Seroprevalence of HIV, HBV, HCV and syphilis infections among blood donors at
- 14 Gondar University Teaching Hospital, Northwest Ethiopia: declining trends over a period of five years. *BMC Infect Dis* 2010;
- 15 10:111
- 16
- 17 9. Kassu A, Mekonnen A, Bekele A, et.al. HIV and Syphilis Infection among Elderly People in Northwest Ethiopia. *Japan Infect*
- 18 *Dis* 2004; 57:264-7.
- 19
- 20 10. Moges F, Kebede Y, Kassu A, et.al. Seroprevalence of HIV, HBV infections and Syphilis among street dwellers in Gonder
- 21 city, Northwest Ethiopia. *Ethiop J Health Dev* 2006; 20:160-5.
- 22
- 23 11. Ministry of Health, Disease Prevention and Control Department. AIDS in Ethiopia. Technical document for the fifth report.
- 24 2004
- 25
- 26 12. Federal Ministry of Health. National HIV/AIDS Prevention and Control Office. AIDS in Ethiopia. Sixth report. 2006.
- 27
- 28 13. Federal Ministry of Health /Ethiopian Health and Nutrition Research Institute. Report on the 2007 round antenatal care sentinel
- 29 HIV surveillance in Ethiopia. 2010
- 30
- 31
- 32
- 33
- 34
- 35
- 36
- 37
- 38
- 39
- 40
- 41
- 42
- 43
- 44
- 45
- 46
- 47
- 48
- 49



- 1  
2  
3 14. Ethiopian Health and Nutrition Research Institute. Report on the 2009 round antenatal care sentinel HIV surveillance in  
4  
5 Ethiopia. 2011  
6  
7
- 8 15. Uneke C, Ogbu O, Alo M, et.al. Syphilis serology in HIV-positive and HIV-negative Nigerians: The public health  
9  
10 significance. *Online J Health Allied Sci* 2006;5:1-8.  
11
- 12 16. Griemberg G, Bautista CT, Pizzimenti MC, et.al. High prevalence of syphilis-HIV co-infection at four hospitals of the city of  
13  
14 Buenos Aires, Argentina. *Revista Argentina de Microbiología* 2006;38:134-136.  
15  
16
- 17 17. Berhane Y, Mekonnen Y, Seyoum E, Gelmon L, Wilson D. HIV/AIDS in Ethiopia – An Epidemiological Synthesis. Ethiopia  
18  
19 HIV/AIDS Prevention & Control Office (HAPCO) and Global AIDS Monitoring & Evaluation Team (GAMET), World Bank  
20  
21 Global HIV/AIDS Program, 2008.  
22  
23  
24  
25  
26  
27  
28  
29  
30  
31  
32  
33  
34  
35  
36  
37  
38  
39  
40  
41  
42  
43  
44  
45  
46  
47  
48  
49

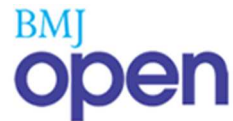

**Sero-prevalence of syphilis among HIV infected individuals  
in Addis Ababa, Ethiopia: A hospital based cross-sectional  
study**

|                                 |                                                                                                                                                                                                                                                                   |
|---------------------------------|-------------------------------------------------------------------------------------------------------------------------------------------------------------------------------------------------------------------------------------------------------------------|
| Journal:                        | <i>BMJ Open</i>                                                                                                                                                                                                                                                   |
| Manuscript ID:                  | bmjopen-2013-002566.R1                                                                                                                                                                                                                                            |
| Article Type:                   | Research                                                                                                                                                                                                                                                          |
| Date Submitted by the Author:   | 17-Feb-2013                                                                                                                                                                                                                                                       |
| Complete List of Authors:       | Eticha, Begna; Madawalabu University, Medicine<br>Sisay, Zufan; Addis Ababa University, Aklilu Lemma Institute of Pathobiology<br>Alemayew, Addisu; Hawasa University, Medical Laboratory Sciences<br>Shimelis, T; Hawasa University, Medical Laboratory Sciences |
| <b>Primary Subject Heading</b>: | Epidemiology                                                                                                                                                                                                                                                      |
| Secondary Subject Heading:      | Infectious diseases, HIV/AIDS                                                                                                                                                                                                                                     |
| Keywords:                       | Epidemiology < INFECTIOUS DISEASES, HIV & AIDS < INFECTIOUS DISEASES, Microbiology < PATHOLOGY                                                                                                                                                                    |
|                                 |                                                                                                                                                                                                                                                                   |

SCHOLARONE™  
Manuscripts

# Sero-prevalence of syphilis among HIV infected individuals in Addis Ababa, Ethiopia: A hospital based cross-sectional study

Begna Tulu<sup>1</sup>, Zufan Sisay<sup>2</sup>, Addisu Alemayehu<sup>3</sup>, and Techalew Shimelis<sup>3\*</sup>

<sup>1</sup>Madawalabu University, Department of Medicine, Bale Goba, Ethiopia

<sup>2</sup>Addis Ababa University, Aklilu Lemma Institute of Pathobiology, Addis Ababa, Ethiopia

<sup>3</sup>Hawassa University, College of Medicine and Health Sciences, PO Box: 1560 Hawassa, Ethiopia

\*Corresponding author: Tel: +251916828259, Email: [techalew03@yahoo.com](mailto:techalew03@yahoo.com)

## ABSTRACT

### Objective

To determine the prevalence of syphilis and its risk factors among people with human immunodeficiency virus (HIV) at a hospital in Ethiopia.

### Design

A hospital based cross-sectional study

### Setting

This study was conducted at one of the largest public hospitals in Addis Ababa, Ethiopia.

### Participants

A consecutive 306 HIV- positive patients were recruited prospectively from January to March 2010. For comparative purposes, 224 HIV- negative consecutive attendees at the voluntary counseling and testing (VCT) center in the same period were also included. Participants under 15 years of age and treated for syphilis and with a CD4+ T cell count below 50 cells / mm<sup>3</sup> were excluded.

### Outcome measures

1  
2  
3 Blood samples and data on socio-demographic and risk factors for syphilis were collected. All  
4  
5 sera were screened for syphilis using rapid plasma reagin (RPR) test, and those positives were re-  
6  
7 tested using *Treponema pallidum* haemagglutination assay (TPHA) test.  
8  
9

## 10 **Results**

11 The sero-prevalence of syphilis among HIV infected individuals was 9.8% compared to 1.3%  
12 among HIV uninfected individuals odds ratio (OR)=8.01 (95% confidence interval (CI)=2.4 to  
13 26.6; p= 0.001). A comparable rate of syphilis was found among men (11%) and women (8.9%)  
14 with HIV infection. Syphilis prevalence non-significantly increased with age, with the highest  
15 rate in 40-49 years of age (16.9%). Except a history of STIs, which associated with syphilis OR=  
16 2.25 (95% CI=1.03 to 4.9; p= 0.042), other risk factors did not raise the odds of infection.  
17  
18  
19  
20  
21  
22

## 23 **Conclusion**

24 The high prevalence of syphilis among people with HIV infection highlights the need to target  
25 this population to prevent the transmission of both infections. Screening all HIV infected people  
26 for syphilis and managing those infected would have clinical and epidemiological importance.  
27  
28  
29  
30  
31

## 32 **ARTICLE SUMMARY**

### 33 **Article focus**

- 34 • To determine the prevalence of syphilis among HIV infected people
- 35 • To compare prevalence of syphilis by HIV status
- 36 • To assess risk factors for syphilis in HIV infected people

### 37 **Key Messages**

- 38 • High prevalence of syphilis among HIV positive individuals was observed
- 39 • Syphilis prevalence is significantly higher among HIV positives than HIV  
40 negative people
- 41 • Syphilis prevalence is not significantly influenced by age and gender

### Strength and limitation of this study

- This hospital based cross-sectional study provided preliminary data that would inform future research.
- The study did not use stronger statistical power to detect the differences in risk factors by syphilis status
- No clinical features of syphilis positive patients were assessed

### INTRODUCTION

Sexually transmitted infections (STIs) are the major public health problems in most parts of the world. Based on the World Health Organization estimate, STIs and their complications are among the top five disease categories for which adults seek health care in developing countries.[1] Syphilis is one of the most important STIs, caused by the bacterium *Treponema pallidum*. [2] It has been estimated that, annually, about 12 million new infections occur worldwide; of which, almost two-thirds are in sub-Saharan Africa and south/southeast Asia.[3] Unprotected sex, blood transfusion, needle sharing, and vertical transmission from mother to the child are major mode of syphilis transmission.[2, 4]

Syphilis, as cause of ulcerative genital lesion, presents site for HIV entry and shading. Moreover, by activating immune cells and raising viral load, syphilis could facilitate HIV transmissibility.[5] On the ether hand, concurrent HIV infection may adversely affect the natural history, clinical manifestations and treatment response of syphilis.[3, 6]

1  
2  
3 In Ethiopia, studies reported syphilis prevalence ranging from 1% to 10.9% in diverse risk  
4 groups such as pregnant women, blood donors, street dwellers and elderly people.[7-10]  
5  
6 Moreover, according to the antenatal care (ANC)-based sentinel surveillances, syphilis  
7  
8 prevalence increased from 1.8% in the year 2003 to 2.7% in 2005, and then it stabilized at 2.3%  
9  
10 in 2007 and 2009. The rates of syphilis-HIV co-infection among ANC attendees had also been  
11  
12 rising from 4.1% in the year 2003 to 4.9% in 2005 and 5.3% in 2007, but dropped to 3.9% in  
13  
14 2009.[11-14] However, because of the limitation that the aforementioned risk groups consist of  
15  
16 smaller size of HIV infected individuals, and the sex and age composition of ANC attendees is  
17  
18 limited to female gender and reproductive age group, the generated data may not reflect the true  
19  
20 picture of syphilis among HIV infected population. Therefore, this study was conducted to  
21  
22 determine the prevalence and risk factors of syphilis among HIV-infected clients at St. Paul's  
23  
24 General Specialized Hospital.  
25  
26  
27  
28  
29  
30  
31  
32

### 33 **METHODS AND MATERIALS**

34  
35

36 This cross-sectional study was conducted at St. Paul's General Specialized Hospital, Addis  
37  
38 Ababa from January to March 2010. The hospital is among the largest public hospitals in  
39  
40 Ethiopia and provides HIV voluntary counseling and testing (VCT) as a routine service. Clients  
41  
42 who are tested HIV positive are registered at the antiretroviral therapy (ART) clinic and assessed  
43  
44 for their disease status. Clinical and immunological assessments (CD4+ T cell count) at  
45  
46 enrollment and at six-monthly follow-up visits help to determine patient eligibility for ART.  
47  
48 Those receiving ART are also monitored for clinical progress on a regular basis. Services  
49  
50 including HIV counselling and testing, clinical and immunological assessments as well as ART  
51  
52  
53  
54  
55  
56  
57  
58  
59  
60

1  
2  
3 are provided free of charge. HIV infected patients are not routinely screened for syphilis and  
4  
5 only those with clinical indications are tested.  
6  
7

8  
9 Consecutive HIV-infected individuals with and without ART status, and who had immunological  
10 and biochemical testing were recruited prospectively. Clients tested HIV negative at the VCT  
11 center during the study period were also recruited for comparative purposes. In total, 306 HIV  
12 positive and 224 HIV negative clients were considered for analysis. In either HIV sero-group,  
13 participants less than 15 years of age, and who took syphilis treatment were excluded, as reactive  
14 non-treponemal test result may not remain after treatment. In HIV-positive clients, those found  
15 with a CD4+ T cell count below 50 cells / mm<sup>3</sup> were excluded from the study due to the  
16 unreliability of serological tests in a state of severe immunosuppression.  
17  
18

19  
20 Counselor nurses interviewed the study participants using structured questionnaire on socio-  
21 demographic and other risk factors such as history of blood transfusion, unsafe injection,  
22 multiple sexual partner, STIs, and syphilis family history. Blood samples were collected and  
23 screened for syphilis using the non-treponemal serologic test, rapid plasma reagin (RPR) test  
24 (Human, Germany). Sera found to be positive by RPR tests were further tested using treponemal  
25 test, modified *Treponema pallidum* haemagglutination assay (TPHA) (Syphicheck-WB, Qualpro  
26 Diagnostics, India). Laboratory testing was carried out according to the directions of the  
27 manufacturers and all tests were run against the positive and negative controls. Only those  
28 samples positive by both RPR and TPHA were considered to have syphilis infection.  
29  
30

31  
32 The study was approved by the Ethics Review Committee of Aklilu Lemma Institute of  
33 Pathobiology, Addis Ababa University, and St. Paul's Hospital management body. Participation  
34 was entirely voluntary, and written consent was obtained from the study subjects. Any  
35  
36  
37  
38  
39  
40  
41  
42  
43  
44  
45  
46  
47  
48  
49  
50  
51  
52  
53  
54  
55  
56  
57  
58  
59  
60

1  
2  
3 information obtained during the study was kept with utmost confidentiality. Syphilis screening  
4  
5 was performed free of charge, and those tested positive were managed by physicians.  
6  
7

8  
9 Data entry and analysis was performed using SPSS Version-16. Results were summarized using  
10  
11 descriptive statistics.. Pearson's Chi-square ( $X^2$ ) test was used to evaluate differences between  
12  
13 proportions;  $X^2$  for linear trend was also calculated using Epi Info Version -7. Binary logistic  
14  
15 regression analysis was used to assess the effect of socio-demographic and other risk factors on  
16  
17 syphilis sero- positivity. The odds ratio (OR) was used as a measure of association.  
18  
19

## 20 21 22 **RESULTS**

23  
24  
25 Out of 312 HIV positive and 228 HIV negative individuals approached during the study period, 6  
26  
27 and 4 individuals were excluded due to refusal to participate, insufficient serum sample and  
28  
29 incomplete questionnaire. Thus, 306 HIV positive and 224 HIV negative clients were considered  
30  
31 for analysis. One hundred eighty eight (61.4%) participants with HIV were receiving ART and  
32  
33 the rest were ART naïve (38.6%). Majority of HIV infected participants were urban dwellers  
34  
35 (95.4%) and married (53.3%) (Table 1). HIV infected respondents had a mean age 35.8 years  
36  
37 (standard deviation (SD)= 8.7; range=19-73 years) compared to 28.2 years (SD=9.8; range= 15-  
38  
39 73 years) in HIV non-infected groups. The male to female ratios in participants with and without  
40  
41 HIV infection were 0.71:1 and 0.96:1, respectively.  
42  
43  
44  
45  
46

47  
48 The prevalence of syphilis infection was 9.8% in HIV positive participants compared to 1.3% in  
49  
50 HIV negative participants; OR=8.01 (95% confidence interval (CI)=2.4 to 26.6; p= 0.001). The  
51  
52 distribution of syphilis was similar among HIV infected clients with and without ART (11.2%  
53  
54 versus 7.6%, respectively; p=0.31). Sera reactive by RPR test were more likely found TPHA  
55  
56 positive among HIV positives (54.5%) than in HIV-negatives (10%) (p< 0.001) (Table 2).  
57  
58  
59  
60



1  
2  
3 Syphilis occurred exclusively among urban dwellers in either HIV sero-groups. Sero-positivity  
4  
5 of syphilis was comparable between men (11%) and women (8.9%) with HIV infection. Syphilis  
6  
7 prevalence seems to increase with increasing age, with the highest rate in the age range 40-49  
8  
9 years (16.9%), though  $X^2$  for linear trend analysis showed no statistical significance ( $X^2=2.46$ ;  $p$   
10  
11 = 0.117). A decreasing rate of syphilis was observed with increasing educational level, where  
12  
13 illiterate HIV-positive participants (22%) had higher odds of infection compared to those having  
14  
15 at least a certificate (5.6%); OR= 4.78 (95% CI=0.96 to 23.8;  $p= 0.056$ ). Similarly, the  
16  
17 association between occupation and syphilis were marginally non-significant where housemaids  
18  
19 (27.3%) were affected compared to government employees (7.3%); OR= 4.75 (95% CI=0.81 to  
20  
21 27.9;  $p= 0.085$ ) (Table 1).  
22  
23  
24  
25  
26  
27

28 RPR, rapid plasma reagin; TPHA, *Treponema pallidum* haemagglutination; ART, antiretroviral  
29  
30 therapy; +ve, positive  
31  
32  
33

34 The exposure of HIV-infected and HIV-non-infected participants to various risk factors of  
35  
36 syphilis is summarized in table 3. Except syphilis family history, which occurred in a comparable  
37  
38 rate in either HIV sero-groups, other risk factors such as history of blood transfusion (10.5%),  
39  
40 having multiple sexual partners (36.9%) and unsafe injection (12.7%), and a history of STIs  
41  
42 (45.4%) were more frequently reported by HIV infected participants. However, it was only a  
43  
44 history of STIs, which significantly associated with syphilis among HIV infected participants;  
45  
46 OR=2.25 (95% CI=1.03 to 4.9;  $p= 0.042$ ).  
47  
48  
49  
50  
51  
52  
53  
54  
55  
56  
57  
58  
59  
60

## DISCUSSION

This study showed that the prevalence of syphilis among HIV positives was 9.8%, with no significant difference between those receiving ART (11.2%) and ART naives (7.6%). The finding appears to be compatible with rates of HIV-syphilis co-infection among street dwellers (7.9%)[8] and elderly people (6%)[9] in northwest Ethiopia (Gondar) and in Nigeria (14%).[15] However, contrasting our result, the co-infection rate was lower among ANC-attendees in Ethiopia (3.9%)[14] and higher among STD clinic attendees in Argentina (59.7%).[16] The observed inconsistencies may be because of the composition of the investigated sub-population, where ANC attendees, for instance, have apparently lower risk of syphilis compared to STD clinic attendees. In view of the adverse impact syphilis has to facilitate the transmission of coexisting HIV, intervention measures targeting this particular risk group has greater importance to prevent both infections.

In the present study, syphilis was significantly associated with HIV infection, where HIV infected individuals had about eight-fold higher risk of syphilis compared to HIV non-infected people. This result was in line with findings that revealed the existence of association between HIV and syphilis in different localities and sub- populations. A consistent two-fold increase in syphilis-HIV co-infection rates among ANC attendees[11-14] and four-fold among street dwellers in Ethiopia,[10] as well as eight-fold in HIV infected population in Nigeria[15] may be because of the fact that HIV and syphilis shares routes of transmission. These reports also indicated the varying strength of association between HIV and syphilis in diverse risk groups. However, none of these studies pointed out whether syphilis and HIV were contracted

1  
2  
3 concurrently or one infection preceded another to explain the causal nature of such  
4  
5 epidemiologic synergy between HIV and syphilis.  
6  
7

8  
9 The sero-prevalence of syphilis was not significantly affected by gender in either HIV sero-  
10  
11 groups, similar to findings elsewhere.[10, 15] However, Griemberg *et al.* reported men had  
12  
13 excess risk of HIV, syphilis and syphilis-HIV co-infection compared to women.[16] This report  
14  
15 is also in contrast to the established higher rate of HIV among women in our region,[17] which  
16  
17 may be due to difference in risk behavior by gender in various geographical regions. We also  
18  
19 found increasing syphilis prevalence with age among HIV infected individuals, with the highest  
20  
21 rate reported in the age group 40-49 years (16.9%), followed by age group above 50 years  
22  
23 (12.5%), though no statistically significant linear trend was observed. A raising syphilis  
24  
25 prevalence with age was consistently reported by others,[8, 10, 14, 15] which might be due to the  
26  
27 increased risk of exposure to syphilis with time. Moreover, our data showed that illiterate and  
28  
29 housemaid HIV infected participants were disproportionately affected by syphilis, which point  
30  
31 the significance of education to prevent syphilis transmission.  
32  
33  
34  
35  
36  
37

38  
39 In Ethiopia, where HIV and syphilis has strong association, and transmission of the former is  
40  
41 primarily through heterosexual exposure,[17] people with multiple sexual partners would  
42  
43 obviously be at higher risk of contracting syphilis as well. Of course, the significance of such a  
44  
45 risk behavior to influence syphilis prevalence was documented in our context, where having  
46  
47 more than two sexual partners increased odds of syphilis infection six-fold compared to those  
48  
49 with no sexual partner.[10] However, the lack of association between a history of multiple sexual  
50  
51 partner and syphilis in our study deserves further investigation for possible explanation. Syphilis  
52  
53  
54  
55  
56  
57  
58  
59  
60

1  
2  
3 prevalence was about two-fold higher among HIV infected participants who reported a history of  
4  
5  
6 STIs compared with those with no history of STIs.  
7

8  
9 Findings in this study need to be interpreted in light of its methodological limitations. First,  
10 absence of association between various risk factors and syphilis might be due to the fact that the  
11 study did not use stronger statistical power to detect the differences. Second, the reduced  
12 sensitivity of non-treponemal tests in primary as well as late latent syphilis and the potential for  
13 false-negative results due to prozone reactions might lead to misinterpretation of non-reactive  
14 RPR test result as absence of the infection. Moreover, the limitation of possible false-positive  
15 reaction with non-treponemal and treponemal tests needs to be given attention, as positive results  
16 may not necessarily indicate disease activity. Last, this study overlooked the importance of  
17 including clinical data, which would have been a good opportunity to describe the clinical  
18 presentation of syphilis among HIV infected patients.  
19  
20  
21  
22  
23

24  
25 In conclusion, this study showed high prevalence of syphilis among HIV infected people  
26 compared to HIV non-infected people. Thus, intervention measures targeting HIV infected  
27 individuals would have paramount importance to prevent transmission of syphilis as well as  
28 HIV. As part of this effort, screening all HIV infected people for syphilis and managing those  
29 infected is critically needed. Further studies using a longitudinal design with stronger power  
30 would reliably investigate the possible interaction between HIV and syphilis.  
31  
32  
33  
34  
35  
36

### 37 **Acknowledgment**

38  
39 We would like to thank the physicians, counselor nurses and laboratory staff of St. Paul's  
40 Hospital for their kind assistance during data collection. Our appreciation also goes to the study  
41 subjects who volunteered to participate in the study. We acknowledge the Aklilu Lemma  
42 Institute of Pathobiology, Addis Ababa University, for financial and logistic support.  
43  
44  
45  
46  
47  
48  
49  
50

### 51 **Authors' contributions**

52  
53  
54 BT was the principal investigator for the study; BT, AA and ZS contributed to the design of the  
55 study; BT carried out the laboratory work; ZS and AA supervised data collection; BT and TS  
56  
57  
58  
59  
60

1  
2  
3 performed the statistical analyses; BT, ZS and TS interpreted the result; all authors contributed to  
4 the write up and approved the final manuscript.  
5  
6  
7

8 **Funding:** The study was financially supported by Aklilu Lemma Institute of Pathobiology,  
9 Addis Ababa University.  
10  
11

12  
13 **Competing Interest:** None declared.  
14

#### 15 **Data Sharing**

16 We have no additional unpublished data from the study  
17  
18  
19  
20  
21  
22  
23  
24

#### 25 **REFERENCES**

- 26  
27 1. World Health Organization (WHO). Guidelines for the Management of Sexually  
28 Transmitted Infections. Revised Version. WHO, Geneva, Switzerland, 2003.  
29
- 30 2. Singh EA, Romanowski B. Syphilis. Review with emphasis on clinical,  
31 epidemiologic, and some biologic features. *Clin Microbiol Rev* 1999;12:187–209.  
32
- 33 3. Lynn WA, Lightman S. Syphilis and HIV: a dangerous combination. *Lancet Infect*  
34 *Dis* 2004;4:456–66.  
35
- 36 4. World Health Organization. Global Elimination of Syphilis: rationale and strategy for  
37 action, 2007.  
38
- 39 5. Ho LE, Lukehart AS. Syphilis: using modern approaches to understand an old  
40 disease. *J Clin Invest* 2011;121:4584–92.  
41
- 42 6. Kassutto S, Sax P. HIV and Syphilis Co-infection: Trends and Interactions. *AIDS*  
43 *Clinic Care* 2003;15:9-18.  
44  
45  
46  
47  
48  
49  
50  
51  
52  
53  
54  
55  
56  
57  
58  
59  
60

- 1  
2  
3  
4  
5  
6  
7  
8  
9  
10  
11  
12  
13  
14  
15  
16  
17  
18  
19  
20  
21  
22  
23  
24  
25  
26  
27  
28  
29  
30  
31  
32  
33  
34  
35  
36  
37  
38  
39  
40  
41  
42  
43  
44  
45  
46  
47  
48  
49  
50  
51  
52  
53  
54  
55  
56  
57  
58  
59  
60
7. Mulu A, Kassu A, Tessema B, *et al.* Sero-prevalence of Syphilis and HIV-1 during pregnancy in a teaching hospital in northwest Ethiopia. *Japan J Infect Dis* 2007;60:193-5.
8. Tessema B, Yismaw G, Kassu A, *et al.* Sero-prevalence of HIV, HBV, HCV and syphilis infections among blood donors at Gondar University Teaching Hospital, northwest Ethiopia: declining trends over a period of five years. *BMC Infect Dis* 2010; 10:111.
9. Kassu A, Mekonnen A, Bekele A, *et al.* HIV and syphilis infection among elderly people in northwest Ethiopia. *Japan Infect Dis* 2004;57:264-7.
10. Moges F, Kebede Y, Kassu A, *et al.* Seroprevalence of HIV, HBV infections and syphilis among street dwellers in Gondar city, northwest Ethiopia. *Ethiop J Health Dev* 2006;20:160-5.
11. Ministry of Health, Disease Prevention and Control Department. AIDS in Ethiopia. Technical document for the fifth report. 2004.
12. Federal Ministry of Health. National HIV/AIDS Prevention and Control Office. AIDS in Ethiopia. Sixth Report. 2006.
13. Federal Ministry of Health /Ethiopian Health and Nutrition Research Institute. Report on the 2007 round antenatal care sentinel HIV surveillance in Ethiopia. 2010.
14. Ethiopian Health and Nutrition Research Institute. Report on the 2009 round antenatal care sentinel HIV surveillance in Ethiopia. 2011
15. Uneke C, Ogbu O, Alo M, *et al.* Syphilis serology in HIV-positive and HIV-negative Nigerians: The public health significance. *Online J Health Allied Sci* 2006;5:1-8.

- 1  
2  
3 16. Griemberg G, Bautista CT, Pizzimenti MC, *et al.* High prevalence of syphilis-HIV  
4 co-infection at four hospitals of the city of Buenos Aires, Argentina. *Revista*  
5  
6 *Argentina de Microbiología* 2006;38:134-6.  
7  
8  
9  
10 17. Berhane Y, Mekonnen Y, Seyoum E, *et al.* HIV/AIDS in Ethiopia – An  
11 epidemiological synthesis. Ethiopia HIV/AIDS Prevention & Control Office  
12 (HAPCO) and Global AIDS Monitoring & Evaluation Team (GAMET), World Bank  
13 Global HIV/AIDS Program, 2008.  
14  
15  
16  
17  
18  
19  
20  
21  
22  
23  
24  
25  
26  
27  
28  
29  
30  
31  
32  
33  
34  
35  
36  
37  
38  
39  
40  
41  
42  
43  
44  
45  
46  
47  
48  
49  
50  
51  
52  
53  
54  
55  
56  
57  
58  
59  
60

Table 1. Syphilis infection in relation to socio-demography in HIV-positive and HIV- negative individuals at St. Paul Hospital, 2010

| Characteristics       | HIV positive        |                                       |                             | HIV negative         |                                       |                             |
|-----------------------|---------------------|---------------------------------------|-----------------------------|----------------------|---------------------------------------|-----------------------------|
|                       | Number(%)<br>tested | Number(%)<br>positive for<br>syphilis | Crude odds<br>ratio(95% CI) | Number(<br>%) tested | Number(%)<br>positive for<br>syphilis | Crude odds<br>ratio(95% CI) |
| Residence             |                     |                                       |                             |                      |                                       |                             |
| Rural                 | 14 (4.6)            | 0                                     |                             | 18(8)                | 0                                     |                             |
| Urban                 | 292(95.4)           | 30(10.3)                              | -                           | 206(92)              | 3(1.5)                                | -                           |
| Sex                   |                     |                                       |                             |                      |                                       |                             |
| Female                | 179(58.5)           | 16(8.9)                               | 1                           | 114(50.9)            | 1(0.9)                                | 1                           |
| Male                  | 127(41.5)           | 14(11)                                | 1.26(0.59-2.69)             | 110(49.1)            | 2(1.8)                                | 2.1(0.18-23.4)              |
| Age (years)           |                     |                                       |                             |                      |                                       |                             |
| <19                   | 2(0.7)              | 0                                     | -                           | 52(23.2)             | 1(1.9)                                | 1.84(0.11-30.1)             |
| 20-29                 | 65(21.2)            | 4(6.2)                                | 1                           | 95(42.4)             | 1(1.1)                                | 1                           |
| 30-39                 | 156(51)             | 13(8.3)                               | 1.39(0.41-4.42)             | 47(21)               | 0                                     | -                           |
| 40-49                 | 59(19.3)            | 10(16.9)                              | 3.11(0.92-10.5)             | 19(8.5)              | 1(5.3)                                | 5.2(0.31-87.4)              |
| >50                   | 24(7.8)             | 3(12.5)                               | 2.18(0.45-10.5)             | 11(4.9)              | 0                                     | -                           |
| Marital status        |                     |                                       |                             |                      |                                       |                             |
| Single                | 60(19.6)            | 5(8.3)                                | 1.41(0.39-5.1)              | 146(65.2)            | 3(2.1)                                | -                           |
| Married               | 163(53.3)           | 20(12.3)                              | 2.2(0.79-6)                 | 60(26.8)             | 0                                     |                             |
| Divorced/<br>Widowed  | 83(27.1)            | 5(6)                                  | 1                           | 18(8)                | 0                                     |                             |
| Religion              |                     |                                       |                             |                      |                                       |                             |
| Orthodox              | 228(74.5)           | 24(10.5)                              | 2.1(0.47-9.1)               | 170(75.9)            | 3(1.8)                                | -                           |
| Protestant            | 41(13.4)            | 4(9.8)                                | 1.9(0.32-10.9)              | 25(11.2)             | 0                                     |                             |
| Muslim                | 37(12.1)            | 2(5.4)                                | 1                           | 29(12.9)             | 0                                     |                             |
| Educational<br>status |                     |                                       |                             |                      |                                       |                             |
| Illiterate            | 41(13.4)            | 9(22)                                 | 4.78(0.96-23.8)             | 13(5.8)              | 0                                     |                             |
| Primary school        | 95(31)              | 8(8.4)                                | 1.56(0.32-7.74)             | 51(22.8)             | 0                                     |                             |



|                       |           |         |                 |           |        |                 |
|-----------------------|-----------|---------|-----------------|-----------|--------|-----------------|
| Secondary school      | 134(43.8) | 11(8.2) | 1.52(0.32-7.19) | 124(55.4) | 2(1.6) | -               |
| Certificate and above | 36(11.8)  | 2(5.6)  | 1               | 36(16.1)  | 1(2.8) |                 |
| Occupation            |           |         |                 |           |        |                 |
| Government employee   | 41(13.4)  | 3(7.3)  | 1               | 29(12.9)  | 1(3.4) | 1               |
| Private employee      | 82(26.8)  | 8(9.8)  | 1.37(0.34-5.46) | 71(31.7)  | 1(1.4) | 0.4(0.02-6.62)  |
| Housewife             | 63(20.6)  | 6(9.5)  | 1.33(0.31-5.66) | 21(9.4)   | 0      | -               |
| Student               | 5(1.6)    | 0       | -               | 41(18.3)  | 1(2.4) | 0.7(0.04-11.67) |
| Merchant              | 35(11.4)  | 4(11.4) | 1.63(0.34-7.86) | 19(8.5)   | 0      |                 |
| House maid            | 11(3.6)   | 3(27.3) | 4.75(0.81-27.9) | 7(3.1)    | 0      |                 |
| No work               | 69(22.5)  | 6(8.7)  | 1.21(0.29-5.11) | 36(16.1)  | 0      |                 |
| Ethnicity             |           |         |                 |           |        |                 |
| Amhara                | 156(51)   | 14(9)   | 1               | 117(52.2) | 2(1.7) | 1               |
| Oromo                 | 87(28.4)  | 9(10.3) | 1.2(0.49-2.83)  | 64(28.6)  | 1(1.6) | 0.9(0.08-10.3)  |
| Others                | 63(20.6)  | 7(11.1) | 1.3(0.49-3.3)   | 43(19.2)  | 0      | -               |

Table 2. Syphilis serological tests in HIV positive and HIV negative individuals at Saint Paul's Hospital, 2010.

| Syphilis test | Total tested | Number (%) of positive | HIV- positive |         |           |         |        |         | HIV- negative |         |
|---------------|--------------|------------------------|---------------|---------|-----------|---------|--------|---------|---------------|---------|
|               |              |                        | ART Users     |         | ART Naïve |         | Total  |         | Tested        | +Ve (%) |
|               |              |                        | Tested        | +Ve (%) | Tested    | +Ve (%) | Tested | +Ve (%) |               |         |
|               |              |                        |               |         |           |         |        |         |               |         |

1  
2  
3  
4  
5  
6  
7  
8  
9  
10  
11  
12  
13  
14  
15  
16  
17  
18  
19  
20  
21  
22  
23  
24  
25  
26  
27  
28  
29  
30  
31  
32  
33  
34  
35  
36  
37  
38  
39  
40  
41  
42  
43  
44  
45  
46  
47  
48  
49

|                 |     |          |     |          |     |         |     |          |     |          |
|-----------------|-----|----------|-----|----------|-----|---------|-----|----------|-----|----------|
| RPR             | 530 | 85(16)   | 188 | 36(19.1) | 118 | 19(5.6) | 306 | 55(18)   | 224 | 30(13.4) |
| TPHA            | 85  | 33(38.8) | 36  | 21(58.3) | 19  | 9(47.4) | 55  | 30(54.5) | 30  | 3(10)    |
| Syphilis        | 530 | 33(6.2)  | 188 | 21(11.2) | 118 | 9(7.6)  | 306 | 30(9.8)  | 224 | 3(1.3)   |
| sero-positivity |     |          |     |          |     |         |     |          |     |          |

RPR, rapid plasma reagin; TPHA, *Treponema pallidum* haemagglutination; ART, antiretroviral therapy; +ve, positive

For peer review only

Table 3 syphilis infection in relation to syphilis risk factors in HIV-positive and HIV- negative individuals at St. Paul Hospital, 2010

| Characteristics                      | HIV positive        |                                       |                             | HIV negative        |                                       |                                |
|--------------------------------------|---------------------|---------------------------------------|-----------------------------|---------------------|---------------------------------------|--------------------------------|
|                                      | Number(%)<br>tested | Number(%)<br>positive for<br>syphilis | Crude odds<br>ratio(95% CI) | Number(%)<br>tested | Number(%)<br>positive for<br>syphilis | Crude odds<br>ratio(95%<br>CI) |
| Blood transfusion                    |                     |                                       |                             |                     |                                       |                                |
| No                                   | 274(89.5)           | 28(10.2)                              | 1                           | 216(96.4)           | 3(1.4)                                | -                              |
| Yes                                  | 32(10.5)            | 2(6.2)                                | 0.59 (0.13-2.58)            | 8(3.6)              | 0                                     |                                |
| Multiple sexual partner              |                     |                                       |                             |                     |                                       |                                |
| No                                   | 193(63.1)           | 19(9.8)                               | 1                           | 195(87.1)           | 2(1)                                  | 1                              |
| Yes                                  | 113(36.9)           | 11(9.7)                               | 0.99(0.45-2.16)             | 29(12.9)            | 1(3.4)                                | 3.45(0.3-39.2)                 |
| Unsafe injection                     |                     |                                       |                             |                     |                                       |                                |
| No                                   | 267(87.3)           | 27(10.1)                              | 1                           | 219(97.8)           | 3(1.4)                                | -                              |
| Yes                                  | 39(12.7)            | 3(7.7)                                | 0.71(0.21-2.57)             | 5(2.2)              | 0                                     |                                |
| Syphilis family history              |                     |                                       |                             |                     |                                       |                                |
| No                                   | 281(91.8)           | 26(9.3)                               | 1                           | 200(89.3)           | 2(1)                                  | 1                              |
| Yes                                  | 25(8.2)             | 4(16)                                 | 1.87(0.60-5.86)             | 24(10.7)            | 1(4.2)                                | 4.3(0.38-49)                   |
| STIs                                 |                     |                                       |                             |                     |                                       |                                |
| No                                   | 167(54.6)           | 11(6.6)                               | 1                           | 182(81.2)           | 2(1.1)                                | 1                              |
| Yes                                  | 139(45.4)           | 19(13.7)                              | 2.25(1.03-4.9)              | 42(18.8)            | 1(2.4)                                | (0.19-24.8)                    |
| STIs, sexually transmitted infection |                     |                                       |                             |                     |                                       |                                |

1  
2  
3  
4  
5  
6  
7  
8  
9  
10  
11  
12  
13  
14  
15  
16  
17  
18  
19  
20  
21  
22  
23  
24  
25  
26  
27  
28  
29  
30  
31  
32  
33  
34  
35  
36  
37  
38  
39  
40  
41  
42  
43  
44  
45  
46  
47  
48  
49

**Higher sSero-prevalence of syphilis among HIV infected individuals in Addis Ababa, Ethiopia:  
A hospital based cross-sectional study**

Begna Tulu<sup>1</sup>, Zufan Sisay<sup>2</sup>, Addisu Alemayehu<sup>3</sup>, and Techalew Shimelis<sup>3\*</sup>

<sup>1</sup>Madawalabu University, Department of Medicine, Bale Goba, Ethiopia  
<sup>2</sup>Addis Ababa University, Aklilu Lemma Institute of Pathobiology, Addis Ababa, Ethiopia  
<sup>3</sup>Hawassa University, College of Medicine and Health Sciences, PO Box: 1560 Hawassa, Ethiopia

\*Corresponding author: Tel: +251916828259, Email: [techalew03@yahoo.com](mailto:techalew03@yahoo.com)

## ABSTRACT

### Objective

To determine the prevalence of syphilis and its risk factors among people with human immunodeficiency virus (HIV) at a hospital in Ethiopia.

### Design

A hospital based cross-sectional study

### Setting

This study was conducted at one of the largest public hospitals in Addis Ababa, Ethiopia.

### Participants

A consecutive 306 HIV- positive patients were recruited prospectively from January to March 2010. For comparative purposes, 224

HIV- negative consecutive attendees at the voluntary counseling and testing (VCT) center in the same period were also included.

Participants under 15 years of age and treated for syphilis and with a CD4+ T cell count below 50 cells / mm<sup>3</sup> were excluded.

### Outcome measures

Blood samples and data on socio-demographic and risk factors for syphilis were collected. All sera were screened for syphilis using

~~r~~Rapid ~~P~~lasma ~~r~~Reagin (RPR) test, and those positives were re-tested using ~~Treponema p~~*Treponema pallidum* ~~h~~Haemagglutination ~~assay~~

(TPHA) test.

### Results

The sero-prevalence of syphilis among HIV infected individuals was 9.8% compared to 1.3% among HIV uninfected individuals

~~(~~Odds ratio (OR) = 8.01; ~~95%~~ confidence interval (CI) = 2.4 to 26.6; p= 0.001). A comparable rate of syphilis was found among men

(11%) and women (8.9%) with HIV infection. Syphilis prevalence non-significantly increased with age, with the highest rate in 40-49

1  
2  
3  
4  
5  
6 | years of age (16.9%). Except a history of STIs, which associated with syphilis (OR= 2.25; (95% CI=1.03 to 4.9; p= 0.042), other risk  
7 factors did not raise the odds of infection.  
8

### 9 **Conclusion**

10 The high prevalence of syphilis among people with HIV infection highlights the need to target this population to prevent the  
11 transmission of both infections. Screening all HIV infected people for syphilis and managing those infected would have clinical and  
12 epidemiological importance.  
13  
14

## 15 **ARTICLE SUMMARY**

### 16 **Article focus**

- 17 • To determine the prevalence of syphilis among HIV infected people
- 18 • To compare prevalence of syphilis by HIV status
- 19 • To assess risk factors for syphilis in HIV infected people

### 20 **Key Messages**

- 21 • High prevalence of syphilis among HIV positive individuals was observed
- 22 • Syphilis prevalence is significantly higher among HIV positives than HIV negative people
- 23 • Syphilis prevalence is not significantly influenced by age and gender

### Strength and limitation of this study

- This hospital based cross-sectional study provided preliminary data that would inform future for further detailed information-research.
- The study did not use stronger statistical power to detect the differences in risk factors by syphilis status.
- No clinical features of syphilis positive patients were assessed.

Formatted: Bullets and Numbering

Formatted: Font:

Formatted: Font:

Formatted: Indent: Left: 0.75"

### INTRODUCTION

Sexually transmitted infections (STIs) are the major public health problems in most parts of the world. Based on the World Health Organization estimate, STIs and their complications are among the top five disease categories for which adults seek health care in developing countries.[1] Syphilis is one of the most important STIs, caused by the bacterium *Treponema pallidum*. [2] It has been estimated that, annually, about 12 million new infections occur worldwide; of which, almost two-thirds are in sub-Saharan Africa and south/southeast Asia.[3] Unprotected sex, blood transfusion, needle sharing, and vertical transmission from mother to the child are major mode of syphilis transmission.[2, 4]

Syphilis, as cause of ulcerative genital lesion, presents site for HIV entry and shading. Moreover, by activating immune cells and raising viral load, syphilis could facilitate HIV transmissibility.[5] On the ether hand, concurrent HIV infection may adversely affect the natural history, clinical manifestations and treatment response of syphilis.[3, 6]



1  
2  
3  
4  
5  
6  
7 In Ethiopia, studies reported syphilis prevalence ranging from 1% to 10.9% in diverse risk groups such as pregnant women, blood  
8 donors, street dwellers and elderly people.[7-10] Moreover, according to the antenatal care (ANC)-based sentinel surveillances,  
9 syphilis prevalence increased from 1.8% in the year 2003 to 2.7% in 2005, and then it stabilized at 2.3% in 2007 and 2009. The rates  
10 of syphilis-HIV co-infection among ANC attendees had also been rising from 4.1% in the year 2003 to 4.9% in 2005 and 5.3% in  
11 2007, but dropped to 3.9% in 2009.<sup>[11-14][11-14]</sup> However, because of the limitation that the aforementioned risk groups consist of  
12 smaller size of HIV infected individuals, and the sex and age composition of ANC attendees is limited to female gender and  
13 reproductive age group, the generated data may not reflect the true picture of syphilis among HIV infected population. Therefore, this  
14 study was conducted to determine the prevalence and risk factors of syphilis among HIV-infected clients at St. Paul's General  
15 Specialized Hospital.  
16  
17  
18  
19  
20  
21  
22  
23

## 24 25 **METHODS AND MATERIALS** 26

27  
28 This cross-sectional study was conducted at St. Paul's General Specialized Hospital, Addis Ababa from January to March 2010. The  
29 hospital is among the largest public hospitals in Ethiopia and provides HIV voluntary counseling and testing (VCT) as a routine  
30 service. Clients who are tested HIV positive are registered at the antiretroviral therapy (ART) clinic and assessed for their disease  
31 status. Clinical and immunological assessments (CD4+ T cell count) at enrollment and at six-monthly follow-up visits help to  
32 determine patient eligibility for ART. Those receiving ART are also monitored for clinical progress on a regular basis. Services  
33  
34  
35  
36  
37  
38  
39  
40  
41  
42  
43  
44  
45

1  
2  
3  
4  
5  
6 including HIV counselling and testing, clinical and immunological assessments as well as ART are provided free of charge. HIV  
7 infected patients are not routinely screened for syphilis and only those with clinical indications are tested.  
8

9  
10  
11 Consecutive HIV-infected individuals with and without ART status, and who had immunological and biochemical testing were  
12 recruited prospectively. Clients tested HIV negative at the VCT center during the study period were also recruited for comparative  
13 purposes. In total, 306 HIV positive and 224 HIV negative clients were considered for analysis. In ~~both~~ either HIV sero-groups,  
14 participants under less than 15 years of age, and who took syphilis treatment were ~~excluded~~ excluded, as reactive non-treponemal test  
15 result may not remain after treatment. In HIV-positive clients, those found with a CD4+ T cell count below 50 cells / mm<sup>3</sup> were  
16 excluded from the study due to the unreliability of serological tests in a state of severe immunosuppression.  
17  
18  
19  
20  
21

22  
23  
24 Counselor nurses interviewed the study participants using structured questionnaire on socio-demographic and other risk factors such  
25 as history of blood transfusion, unsafe injection, multiple sexual partner, ~~sexual transmitted infections (STIs)~~, and syphilis family  
26 history. Blood samples were collected and screened for syphilis using the non-treponemal serologic test, rapid plasma reagin (RPR)  
27 test (Human, Germany). Sera found to be positive by RPR tests were further tested using treponemal test, modified *Treponema*  
28 *pallidum* haemagglutination assay (TPHA) ~~test~~ (Syphicheck–WB, Qualpro Diagnostics, India). Laboratory testing was carried out  
29 according to the directions of the manufacturers and all tests were run against the positive and negative controls. Only those samples  
30 positive by both RPR and TPHA were considered to have syphilis infection.  
31  
32  
33  
34  
35  
36  
37  
38  
39  
40  
41  
42  
43  
44  
45  
46  
47  
48  
49

1  
2  
3  
4  
5  
6  
7 The study was approved by the Ethics Review Committee of Aklilu Lemma Institute of Pathobiology, Addis Ababa University, and  
8 St. Paul's Hospital management body. Participation was entirely voluntary, and written consent was obtained from the study subjects.  
9  
10 Any information obtained during the study was kept with utmost confidentiality. Syphilis screening was performed free of charge, and  
11 those tested positive were managed by physicians.  
12  
13

14  
15 Data entry and analysis was performed using SPSS Version-16. Results ~~was were~~ summarized using descriptive statistics, ~~including~~  
16 ~~mean, range and proportions.~~ Pearson's Chi-square ( $X^2$ ) test was used to evaluate ~~D~~ differences ~~in-between~~ proportions; ~~X<sup>2</sup> was~~  
17 ~~evaluated using Pearson's Chi square test~~ for linear trend was also calculated using Epi Info Version -7. Binary logistic regression  
18  
19 analysis was used to assess the effect of socio-demographic and other risk factors on syphilis sero- positivity. ~~The O~~odds ratio (OR)  
20  
21 was used as a measure of ~~the strength of~~ association.  
22  
23  
24  
25

## 26 RESULTS

27  
28  
29 Out of 312 HIV positive and 228 HIV negative individuals approached during the study period, 6 and 4 individuals were excluded due  
30 to refusal to participate, insufficient serum sample and incomplete ~~questioner~~questionnaire. Thus, 306 HIV positive and 224 HIV  
31  
32 negative clients were considered for analysis. One hundred eighty eight (61.4%) participants with HIV were receiving ART and the  
33  
34 rest were ART naïve (38.6%). Majority of HIV infected participants were urban dwellers (95.4%) and married (53.3%) (Table 1). HIV  
35  
36 infected respondents had a mean age 35.8 years (~~(standard deviation (SD) =~~ 8.7; range = 19--73 years) compared to 28.2 years (SD =  
37  
38  
39  
40  
41  
42  
43  
44  
45  
46  
47  
48  
49

Formatted: Superscript

9.8; range = 15- 73 years) in HIV non-infected groups. The male to female ratios in participants with and without HIV infection were 0.71:1 and 0.96:1, respectively.

Table 1. Syphilis infection in relation to socio-demography in HIV-positive and HIV- negative individuals at St. Paul Hospital, 2010

| Characteristics      | HIV positive        |                                       |                             | HIV negative         |                                       |                             |
|----------------------|---------------------|---------------------------------------|-----------------------------|----------------------|---------------------------------------|-----------------------------|
|                      | Number(%)<br>tested | Number(%)<br>positive for<br>syphilis | Crude odds<br>ratio(95% CI) | Number(<br>%) tested | Number(%)<br>positive for<br>syphilis | Crude odds<br>ratio(95% CI) |
| Residence            |                     |                                       |                             |                      |                                       |                             |
| Rural                | 14 (4.6)            | 0                                     |                             | 18(8)                | 0                                     |                             |
| Urban                | 292(95.4)           | 30(10.3)                              | -                           | 206(92)              | 3(1.5)                                | -                           |
| Sex                  |                     |                                       |                             |                      |                                       |                             |
| Female               | 179(58.5)           | 16(8.9)                               | 1                           | 114(50.9)            | 1(0.9)                                | 1                           |
| Male                 | 127(41.5)           | 14(11)                                | 1.26(0.59-2.69)             | 110(49.1)            | 2(1.8)                                | 2.1(0.18-23.4)              |
| Age (years)          |                     |                                       |                             |                      |                                       |                             |
| <19 <del>20</del>    | 2(0.7)              | 0                                     | -                           | 52(23.2)             | 1(1.9)                                | 1.84(0.11-30.1)             |
| 20-29                | 65(21.2)            | 4(6.2)                                | 1                           | 95(42.4)             | 1(1.1)                                | 1                           |
| 30-39                | 156(51)             | 13(8.3)                               | 1.39(0.41-4.42)             | 47(21)               | 0                                     | -                           |
| 40-49                | 59(19.3)            | 10(16.9)                              | 3.11(0.92-10.5)             | 19(8.5)              | 1(5.3)                                | 5.2(0.31-87.4)              |
| ≥50                  | 24(7.8)             | 3(12.5)                               | 2.18(0.45-10.5)             | 11(4.9)              | 0                                     | -                           |
| Marital status       |                     |                                       |                             |                      |                                       |                             |
| Single               | 60(19.6)            | 5(8.3)                                | 1.41(0.39-5.1)              | 146(65.2)            | 3(2.1)                                | -                           |
| Married              | 163(53.3)           | 20(12.3)                              | 2.2(0.79-6)                 | 60(26.8)             | 0                                     |                             |
| Divorced/<br>Widowed | 83(27.1)            | 5(6)                                  | 1                           | 18(8)                | 0                                     |                             |
| Religion             |                     |                                       |                             |                      |                                       |                             |
| Orthodox             | 228(74.5)           | 24(10.5)                              | 2.1(0.47-9.1)               | 170(75.9)            | 3(1.8)                                | -                           |
| Protestant           | 41(13.4)            | 4(9.8)                                | 1.9(0.32-10.9)              | 25(11.2)             | 0                                     |                             |

|                       |           |         |                 |           |        |                 |
|-----------------------|-----------|---------|-----------------|-----------|--------|-----------------|
| Muslim                | 37(12.1)  | 2(5.4)  | 1               | 29(12.9)  | 0      |                 |
| Educational status    |           |         |                 |           |        |                 |
| Illiterate            | 41(13.4)  | 9(22)   | 4.78(0.96-23.8) | 13(5.8)   | 0      |                 |
| Primary school        | 95(31)    | 8(8.4)  | 1.56(0.32-7.74) | 51(22.8)  | 0      |                 |
| Secondary school      | 134(43.8) | 11(8.2) | 1.52(0.32-7.19) | 124(55.4) | 2(1.6) | -               |
| Certificate and above | 36(11.8)  | 2(5.6)  | 1               | 36(16.1)  | 1(2.8) |                 |
| Occupation            |           |         |                 |           |        |                 |
| Government employee   | 41(13.4)  | 3(7.3)  | 1               | 29(12.9)  | 1(3.4) | 1               |
| Private employee      | 82(26.8)  | 8(9.8)  | 1.37(0.34-5.46) | 71(31.7)  | 1(1.4) | 0.4(0.02-6.62)  |
| Housewife             | 63(20.6)  | 6(9.5)  | 1.33(0.31-5.66) | 21(9.4)   | 0      | -               |
| Student               | 5(1.6)    | 0       | -               | 41(18.3)  | 1(2.4) | 0.7(0.04-11.67) |
| Merchant              | 35(11.4)  | 4(11.4) | 1.63(0.34-7.86) | 19(8.5)   | 0      |                 |
| House maid            | 11(3.6)   | 3(27.3) | 4.75(0.81-27.9) | 7(3.1)    | 0      |                 |
| No work               | 69(22.5)  | 6(8.7)  | 1.21(0.29-5.11) | 36(16.1)  | 0      |                 |
| Ethnicity             |           |         |                 |           |        |                 |
| Amhara                | 156(51)   | 14(9)   | 1               | 117(52.2) | 2(1.7) | 1               |
| Oromo                 | 87(28.4)  | 9(10.3) | 1.2(0.49-2.83)  | 64(28.6)  | 1(1.6) | 0.9(0.08-10.3)  |
| Others                | 63(20.6)  | 7(11.1) | 1.3(0.49-3.3)   | 43(19.2)  | 0      | -               |

The prevalence of syphilis infection was 9.8% in HIV positive participants compared to 1.3% in HIV negative participants; (Odds ratio (OR)=8.01; (95% confidence interval (CI)=2.4 to 26.6; p= 0.001). The distribution of syphilis was similar among HIV infected clients with and without ART (11.2% versus 7.6%, respectively; p=0.31). Sera reactive by RPR test were more likely found TPHA positive among HIV positives (54.5%) than in HIV-negatives (10%) (p< 0.001) (Table 2).

Syphilis occurred exclusively among urban dwellers in either HIV sero-groups. Sero-positivity of syphilis was comparable between men (11%) and women (8.9%) with HIV infection. Syphilis prevalence seems to increase with increasing age, with the highest rate in the age range 40-49 years (16.9%), though ~~X<sup>2</sup> for linear trend analysis showed no difference was statistical non-significant compared to age less than 30 years (OR 3.11; 95%CI 0.92 to 10.5)(X<sup>2</sup>=2.46; p = 0.117).~~ A decreasing rate of syphilis was observed with increasing educational level, where illiterate HIV-positive participants (22%) had higher odds of infection compared to those having at least a certificate (5.6%); (OR= 4.78; 95% CI=0.96 to 23.8; p= 0.056). Similarly, the association between occupation and syphilis were marginally non-significant where housemaids (27.3%) were affected compared to government employees (7.3%); (OR= 4.75; 95% CI=0.81 to 27.9; p= 0.085) (Table 1).

Formatted: Superscript

Table 2. Syphilis serological tests in HIV positive and HIV negative individuals at Saint Paul's Hospital, 2010.

| Syphilis test | Total tested | Number (%) of positive | HIV- positive |          |           |         |        |          | HIV- negative |          |
|---------------|--------------|------------------------|---------------|----------|-----------|---------|--------|----------|---------------|----------|
|               |              |                        | ART Users     |          | ART Naïve |         | Total  |          | Tested        | +Ve (%)  |
|               |              |                        | Tested        | +Ve (%)  | Tested    | +Ve (%) | Tested | +Ve (%)  |               |          |
| RPR           | 530          | 85(16)                 | 188           | 36(19.1) | 118       | 19(5.6) | 306    | 55(18)   | 224           | 30(13.4) |
| TPHA          | 85           | 33(38.8)               | 36            | 21(58.3) | 19        | 9(47.4) | 55     | 30(54.5) | 30            | 3(10)    |
| Syphilis      | 530          | 33(6.2)                | 188           | 21(11.2) | 118       | 9(7.6)  | 306    | 30(9.8)  | 224           | 3(1.3)   |

1  
2  
3  
4  
5  
6  
7  
8  
9  
10  
11  
12  
13  
14  
15  
16  
17  
18  
19  
20  
21  
22  
23  
24  
25  
26  
27  
28  
29  
30  
31  
32  
33  
34  
35  
36  
37  
38  
39  
40  
41  
42  
43  
44  
45  
46  
47  
48  
49

sero-positivity

RPR, rapid plasma reagin; TPHA, *Treponema pallidum* haemagglutination; ART, antiretroviral therapy; +ve, positive

The exposure of HIV-infected and HIV-non-infected participants to different various risk factors of syphilis is summarized in table 3. Except syphilis family history, which occurred in a comparable rate in either HIV sero-groups, other risk factors such as history of blood transfusion (10.5%), having multiple sexual partners (36.9%) and unsafe injection (12.7%), and a history of STIs (45.4%) were more frequently reported by HIV infected participants. However, it was only a history of STIs, which significantly associated with syphilis among HIV infected participants: (OR=2.25; 95% CI=1.03 to 4.9; p= 0.042).

Table 3 syphilis infection in relation to syphilis risk factors in HIV-positive and HIV- negative individuals at St. Paul Hospital, 2010

| Characteristics         | HIV positive        |                                       |                             | HIV negative        |                                       |                                |
|-------------------------|---------------------|---------------------------------------|-----------------------------|---------------------|---------------------------------------|--------------------------------|
|                         | Number(%)<br>tested | Number(%)<br>positive for<br>syphilis | Crude odds<br>ratio(95% CI) | Number(%)<br>tested | Number(%)<br>positive for<br>syphilis | Crude odds<br>ratio(95%<br>CI) |
| Blood transfusion       |                     |                                       |                             |                     |                                       |                                |
| No                      | 274(89.5)           | 28(10.2)                              | 1                           | 216(96.4)           | 3(1.4)                                | -                              |
| Yes                     | 32(10.5)            | 2(6.2)                                | 0.59 (0.13-2.58)            | 8(3.6)              | 0                                     |                                |
| Multiple sexual partner |                     |                                       |                             |                     |                                       |                                |
| No                      | 193(63.1)           | 19(9.8)                               | 1                           | 195(87.1)           | 2(1)                                  | 1                              |
| Yes                     | 113(36.9)           | 11(9.7)                               | 0.99(0.45-2.16)             | 29(12.9)            | 1(3.4)                                | 3.45(0.3-39.2)                 |
| Unsafe injection        |                     |                                       |                             |                     |                                       |                                |

Formatted Table

1  
2  
3  
4  
5  
6  
7  
8  
9  
10  
11  
12  
13  
14  
15  
16  
17  
18  
19  
20  
21  
22  
23  
24  
25  
26  
27  
28  
29  
30  
31  
32  
33  
34  
35  
36  
37  
38  
39  
40  
41  
42  
43  
44  
45  
46  
47  
48  
49

|                         |     |           |          |                 |           |        |              |
|-------------------------|-----|-----------|----------|-----------------|-----------|--------|--------------|
|                         | No  | 267(87.3) | 27(10.1) | 1               | 219(97.8) | 3(1.4) | -            |
|                         | Yes | 39(12.7)  | 3(7.7)   | 0.71(0.21-2.57) | 5(2.2)    | 0      |              |
| Syphilis family history | No  | 281(91.8) | 26(9.3)  | 1               | 200(89.3) | 2(1)   | 1            |
|                         | Yes | 25(8.2)   | 4(16)    | 1.87(0.60-5.86) | 24(10.7)  | 1(4.2) | 4.3(0.38-49) |
| STIs                    | No  | 167(54.6) | 11(6.6)  | 1               | 182(81.2) | 2(1.1) | 1            |
|                         | Yes | 139(45.4) | 19(13.7) | 2.25(1.03-4.9)  | 42(18.8)  | 1(2.4) | (0.19-24.8)  |

STIs, sexually transmitted infection

Formatted: Font: (Default) Times New Roman, 12 pt

## DISCUSSION

This study showed that the prevalence of syphilis among HIV positives was 9.8%, with no significant difference between those receiving ART (11.2%) and ART naives (7.6%). The finding appears to be compatible with rates of HIV-syphilis co-infection among street dwellers (7.9%)[8] and elderly people (6%)[9] in northwest Ethiopia (Gondar) and in Nigeria (14%).[15] However, contrasting our result, the co-infection rate was lower among ANC-attendees in Ethiopia (3.9%)[14] and higher among STD clinic attendees in Argentina (59.7%).[16] The observed inconsistencies may be because of the composition of the investigated sub-population, where ANC attendees, for instance, have apparently lower risk of syphilis compared to STD clinic attendees. In view of the adverse impact syphilis has to facilitate the transmission of coexisting HIV, intervention measures targeting this particular risk group has greater importance to prevent both infections.



1  
2  
3  
4  
5  
6  
7 In the present study, syphilis was significantly associated with HIV infection, where HIV infected individuals had about eight-fold  
8 higher risk of syphilis compared to HIV non-infected people. This result was in line with findings that revealed the existence of  
9 association between HIV and syphilis in different localities and sub- populations. A consistent two-fold increase in syphilis-HIV co-  
10 infection rates among ANC attendees[11-14] and four-fold among street dwellers in Ethiopia,[10] as well as eight-fold in HIV  
11 infected population in Nigeria[15] may be because of the fact that HIV and syphilis shares routes of transmission. These reports also  
12 indicated the varying strength of association between HIV and syphilis in diverse risk groups. However, none of these studies pointed  
13 out whether syphilis and HIV were contracted concurrently or one infection preceded another to explain the causal nature of such  
14 epidemiologic synergy between HIV and syphilis.  
15  
16  
17  
18  
19  
20  
21

22  
23 The sero-prevalence of syphilis was not significantly affected by gender in either HIV sero-groups, similar to findings elsewhere.[10,  
24 15] However, Griemberg *et al.* reported men had excess risk of HIV, syphilis and syphilis-HIV co-infection compared to women.[16]  
25 This report is also in contrast to the established higher rate of HIV among women in our region,[17] which may be due to difference in  
26 risk behavior by gender in various geographical regions. We also found increasing syphilis prevalence with age among HIV infected  
27 individuals, with the highest rate reported in the age group 40-49 years (16.9%), followed by age group above 50 years (12.5%),  
28 though ~~no statistically significant linear trend was observed, the difference was non-significant.~~ A raising syphilis prevalence with age  
29 was consistently reported by others,[8, 10, 14, 15] which might be due to the increased risk of exposure to syphilis with time.  
30  
31  
32  
33  
34  
35  
36  
37  
38  
39  
40  
41  
42  
43  
44  
45  
46  
47  
48  
49

Moreover, our data showed that illiterate and housemaid HIV infected participants were disproportionately affected by syphilis, which point the significance of education to prevent syphilis transmission.

In Ethiopia, where HIV and syphilis has strong association, and transmission of the former is primarily through heterosexual exposure,[17] people with multiple sexual partners would obviously be at higher risk of contracting syphilis as well. Of course, the significance of such a risk behavior to influence syphilis prevalence was documented in our context ~~was documented~~, where having more than two sexual partners increased odds of syphilis infection six-fold compared to those with no sexual partner.[10] However, the lack of association between a history of multiple sexual partner and syphilis in our study deserves further investigation for possible explanation. Syphilis prevalence was about two-fold higher among HIV infected participants who reported a history of STIs compared with those with no history of STIs.

Findings in this study need to be interpreted in light of its methodological limitations. First, absence of association between various risk factors and syphilis might be due to the fact that the study did not use stronger statistical power to detect the differences. Second, the reduced sensitivity of non-treponemal tests in primary as well as late latent syphilis and the potential for false-negative results due to prozone reactions might lead to misinterpretation of non-reactive RPR test result as absence of the infection. Moreover, the limitation of possible false-positive reaction with non-treponemal and treponemal tests needs to be given attention, as positive results may not necessarily indicate disease activity. Last, this study overlooked the importance of including clinical data, which would have been a good opportunity to describe the clinical presentation of syphilis among HIV infected patients.

In conclusion, this study showed high prevalence of syphilis among HIV infected people compared to HIV non-infected people. Thus, intervention measures targeting HIV infected individuals would have paramount importance to prevent transmission of syphilis as

Formatted: Font: (Default) Times New Roman

Formatted: Font: (Default) Times New Roman, 12 pt

Formatted: Font: (Default) Times New Roman

Formatted: Font: (Default) Times New Roman, 12 pt

Formatted: Font: (Default) Times New Roman

Formatted: Font: (Default) Times New Roman

Formatted: Font: (Default) Times New Roman, 12 pt

Formatted: Font: (Default) Times New Roman

Formatted: Font: (Default) Times New Roman, 12 pt

Formatted: Font: (Default) Times New Roman, 12 pt

Formatted: Font: (Default) Times New Roman, 12 pt

1  
2  
3  
4  
5  
6  
7 well as HIV. As part of this effort, screening all HIV infected people for syphilis and managing those infected is critically needed.

8 Further studies using a longitudinal design with stronger power would reliably investigate the possible interaction between HIV and  
9 syphilis.  
10

### 11 **Acknowledgment**

12 We would like to thank the physicians, counselor nurses and laboratory staff of St. Paul's Hospital for their kind assistance during data  
13 collection. Our appreciation also goes to the study subjects who volunteered to participate in the study. We acknowledge the Aklilu  
14 Lemma Institute of Pathobiology, Addis Ababa University, for financial and logistic support.  
15  
16  
17  
18

### 19 **Authors' contributions**

20  
21  
22 BT was the principal investigator for the study; BT, AA and ZS contributed to the design of the study; BT carried out the laboratory  
23 work; ZS and AA supervised data collection; BT and TS performed the statistical analyses; BT, ZS and TS interpreted the result; all  
24 authors contributed to the write up and approved the final manuscript.  
25  
26

27  
28 **Funding:** The study was financially supported by Aklilu Lemma Institute of Pathobiology, Addis Ababa University.  
29

30 **Competing Interest:** None declared.  
31

### 32 **REFERENCES**

- 33  
34  
35 1. World Health Organization (WHO). Guidelines for the Management of Sexually Transmitted Infections. Revised Version.  
36 WHO, Geneva, Switzerland, 2003.  
37  
38  
39  
40  
41  
42  
43  
44  
45

Formatted: Numbered + Level: 1 +  
Numbering Style: 1, 2, 3, ... + Start at: 1 +  
Alignment: Left + Aligned at: 0.5" + Tab after:  
0.75" + Indent at: 0.75"

2. Singh EA, Romanowski B. Syphilis. Review with emphasis on clinical, epidemiologic, and some biologic features. *Clin Microbiol Rev* 1999;-12:-187-209.
3. Lynn WA, Lightman S. Syphilis and HIV: a dangerous combination. *Lancet Infect Dis* 2004;-4:-456-66.
4. World Health Organization. Global Elimination of Syphilis: rationale and strategy for action, 2007.
5. Ho LE, Lukehart AS. Syphilis: using modern approaches to understand an old disease. *J Clin Invest* 2011;-121:-4584-92.
6. Kassutto S, Sax P. HIV and Syphilis Co-infection: Trends and Interactions. *AIDS Clinic Care* 2003;-15:-9-18.
7. Mulu Andargachew M, Kassu A fework K, Tessema Belay T, et al. Sero-prevalence of Syphilis and HIV-1 during pregnancy in a teaching hospital in northwest Ethiopia. *Japan J Infect Dis* 2007;-60:-193-5.
8. Tessema B, Yismaw G, Kassu A, et al. Sero-prevalence of HIV, HBV, HCV and syphilis infections among blood donors at Gondar University Teaching Hospital, nNorthwest Ethiopia: declining trends over a period of five years. *BMC Infect Dis* 2010; 10:111.
9. Kassu A, Mekonnen A, Bekele A, et al. HIV and sSyphilis iInfection among eElderly pPeople in nNorthwest Ethiopia. *Japan Infect Dis* 2004;-57:264-7.
10. Moges F, Kebede Y, Kassu A, et al. Seroprevalence of HIV, HBV infections and sSyphilis among street dwellers in Gondar city, nNorthwest Ethiopia. *Ethiop J Health Dev* 2006;-20:160-5.
11. Ministry of Health, Disease Prevention and Control Department. AIDS in Ethiopia. Technical document for the fifth report. 2004.

Formatted: Font: Italic

Formatted: Font: Italic

Formatted: Font: Italic

Formatted: Font: Italic

1  
2  
3  
4  
5  
6  
7  
8  
9  
10  
11  
12  
13  
14  
15  
16  
17  
18  
19  
20  
21  
22  
23  
24  
25  
26  
27  
28  
29  
30  
31  
32  
33  
34  
35  
36  
37  
38  
39  
40  
41  
42  
43  
44  
45  
46  
47  
48  
49

12. Federal Ministry of Health. National HIV/AIDS Prevention and Control Office. AIDS in Ethiopia. Sixth Report. 2006.

13. Federal Ministry of Health /Ethiopian Health and Nutrition Research Institute. Report on the 2007 round antenatal care sentinel HIV surveillance in Ethiopia. 2010.

14. Ethiopian Health and Nutrition Research Institute. Report on the 2009 round antenatal care sentinel HIV surveillance in Ethiopia. 2011

15. Uneke C, Ogbu O, Alo M, *et. al.* Syphilis serology in HIV-positive and HIV-negative Nigerians: The public health significance. *Online J Health Allied Sci* 2006;5:1-8.

16. Griemberg G, Bautista CT, Pizzimenti MC, *et. al.* High prevalence of syphilis-HIV co-infection at four hospitals of the city of Buenos Aires, Argentina. *Revista Argentina de Microbiología* 2006;38:134-136.

17. Berhane Y, Mekonnen Y, Seyoum E, ~~Gelmon L, Wilson Det al.~~ HIV/AIDS in Ethiopia – An epidemiological synthesis. Ethiopia HIV/AIDS Prevention & Control Office (HAPCO) and Global AIDS Monitoring & Evaluation Team (GAMET), World Bank Global HIV/AIDS Program, 2008.

Formatted: Font: Italic

Formatted: Font: Italic

Formatted: Font: Italic

Formatted: Font: Italic
